# Supplementary material for: Comparative transcriptome analysis reveals key epigenetic targets in SARS-CoV-2 infection
Source: PubMed Central journal article supplement (PMC8144203; doi:10.1038/s41540-021-00181-x), 2021-05-24
Supplement: 41540_2021_181_MOESM1_ESM.pdf [file 41540_2021_181_MOESM1_ESM.pdf]

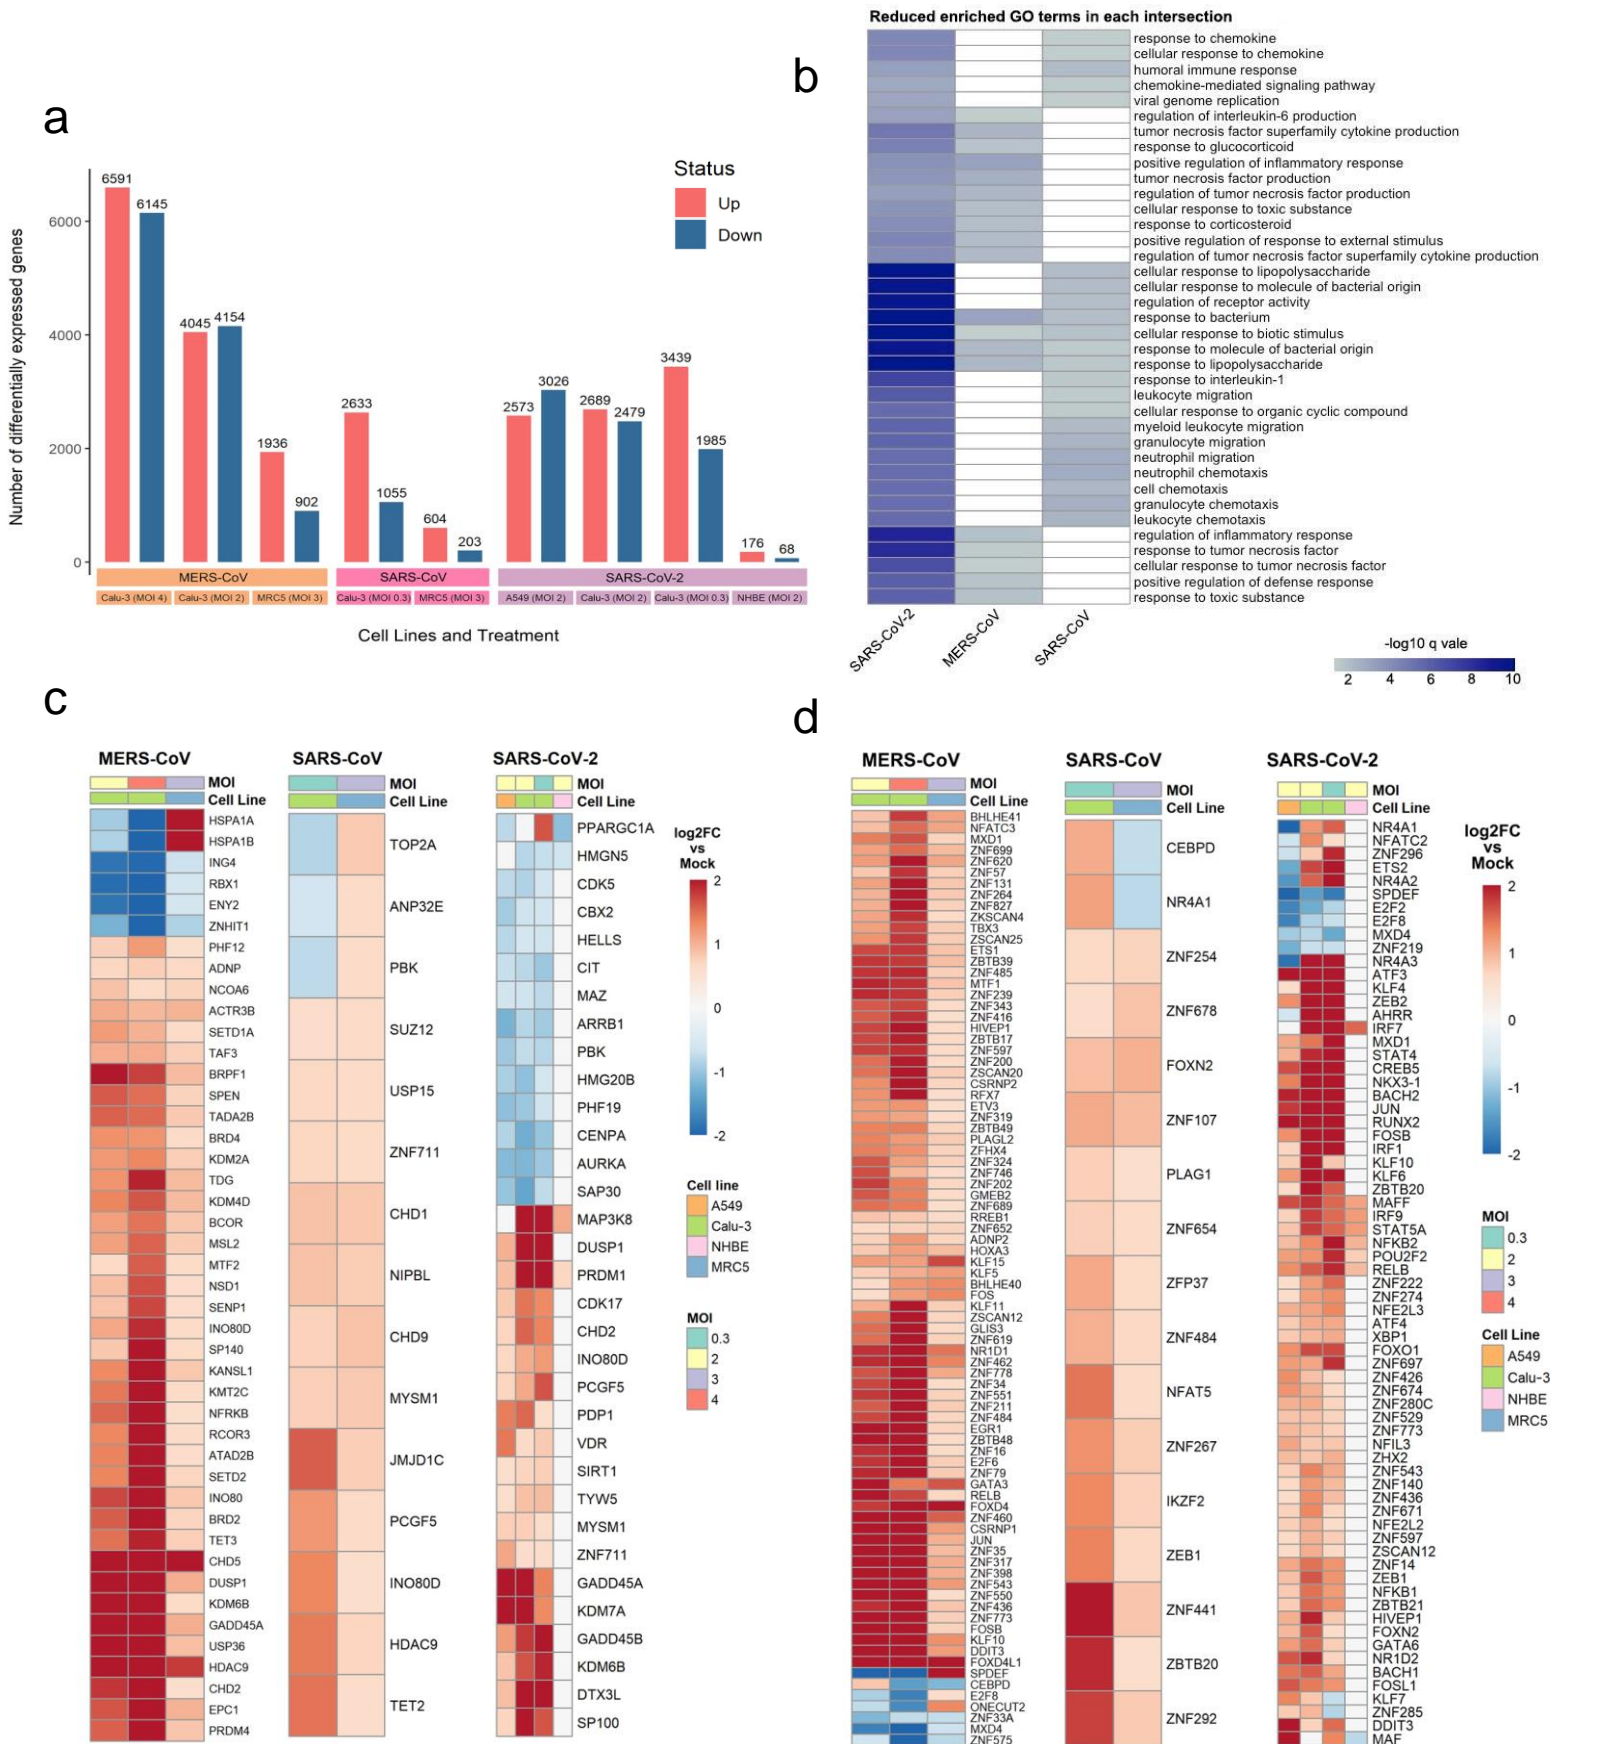

**Supplementary Figure 1. Differential expression analysis of Coronaviruses infected cell lines.**

**a** Number of up and down-regulated differentially expressed genes (DEGs) in the analyzed cell lines for each viral infection. **b** Reduced enriched GO terms shared between two or more virus-associated gene sets. **c** Log2 fold-change expression of SARS-CoV-2 virus-associated epifactors across different viral infections; blank color represents non-significant differential expression. **d** Log2 fold-change expression of SARS-CoV-2 virus-associated TFs across different viral infections; blank color represents non-significant differential expression.

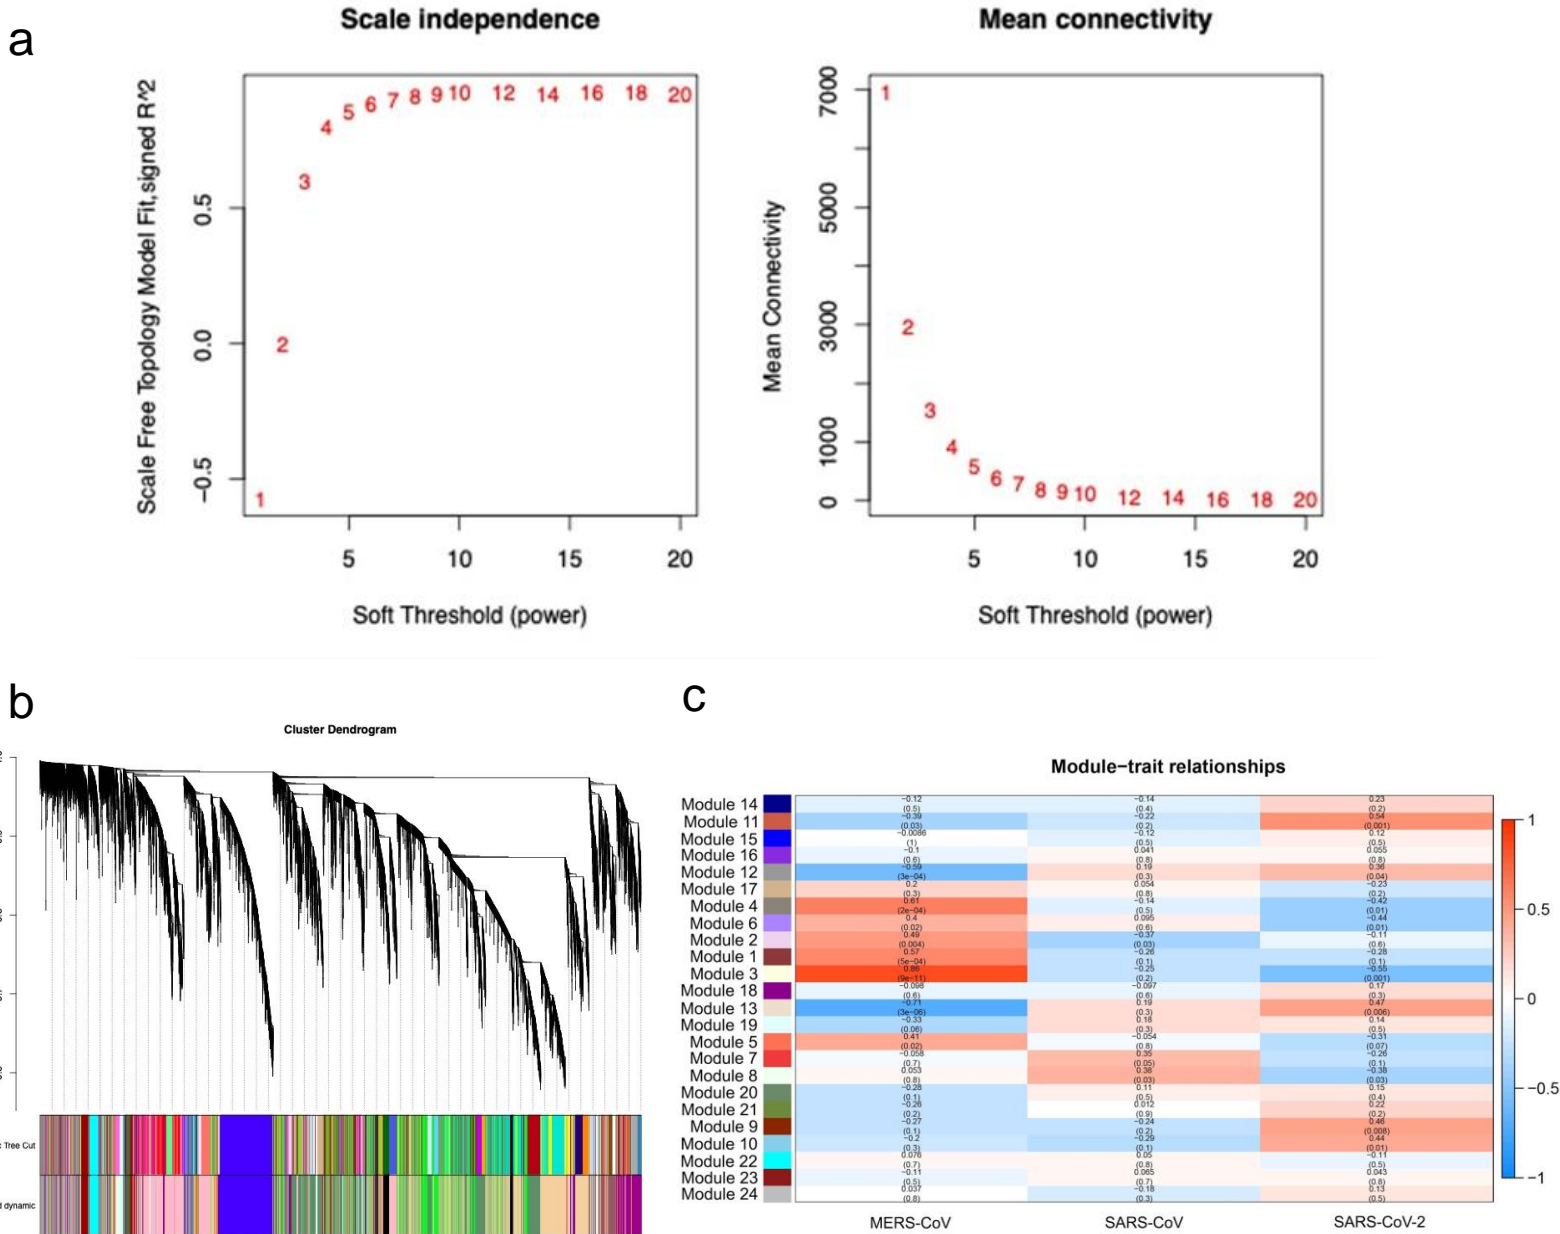

**Supplementary Figure 2. Weighted Gene Co-expression Network.** **a** Analysis of network topology for different soft-thresholding powers. **b** Clustering dendrogram of genes with their corresponding module colors before (Dynamic Cut Tree) and after (Merged Dynamic) similarity merging. **c** Module-virus association; the numbers inside each cell correspond to the correlation coefficient (top), which also dictates the cell color, and p value (bottom).

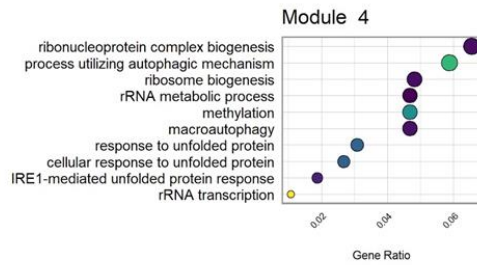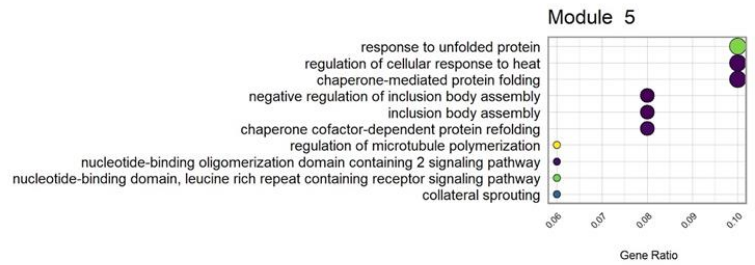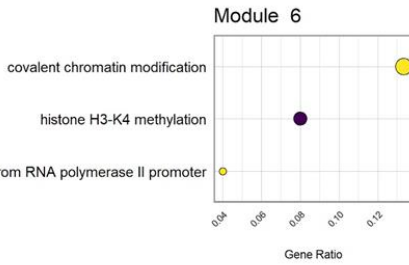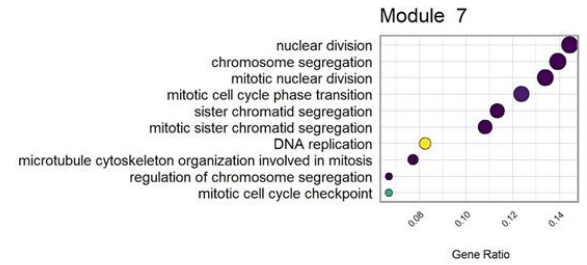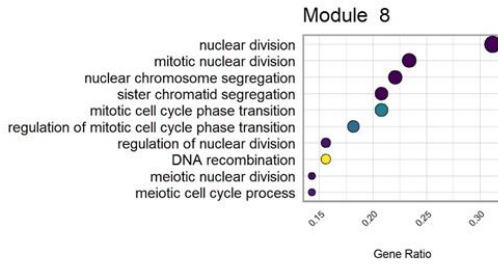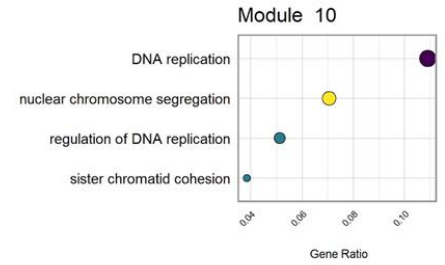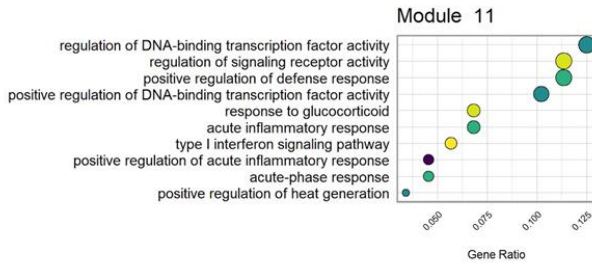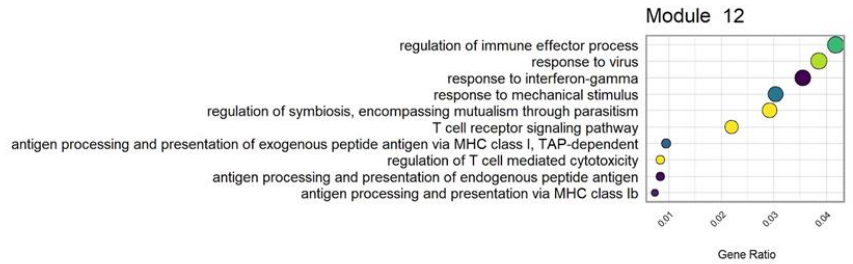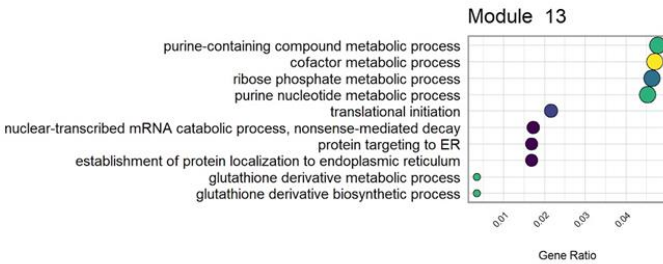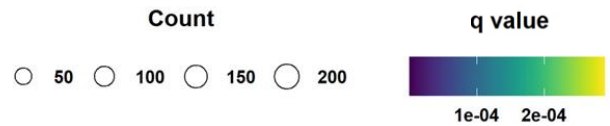

**Supplementary Figure 3. Top 10 simplified enriched Gene Ontology terms of biological process in each of the relevant modules for coronaviruses infection. Go terms are ordered by q-value. Modules 1, 2, 3 and 9 are missing because they were not significantly enriched with any GO term.**

**a**

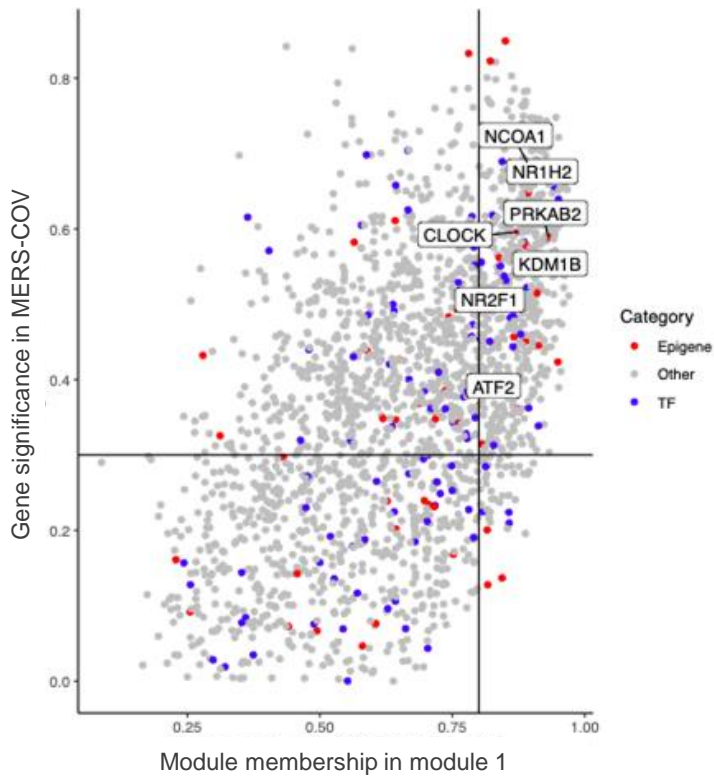

**b**

| Gene   | Function                                     | Drug                                                   |
|--------|----------------------------------------------|--------------------------------------------------------|
| NCOA1  | Nuclear receptor coactivator / H3 and H4 HAT | Etoposide, Tamoxifen                                   |
| NR1H2  | Nuclear receptor / TF                        | Bexarotene, Diacerein, Alitretinoin, Isopropyl alcohol |
| PRKAB2 | Regulatory subunit of AMPK                   | Metformin, Fostamatinib, Acetylsalicylic acid          |
| CLOCK  | Regulation of circadian rhythms (TF)         | Salbutamol                                             |
| KDM1B  | Histone lysine demethylase                   | Tranylcypromine                                        |
| ATF2   | TF / H2B and H4 HAT                          | Pseudoephedrine                                        |

**c**

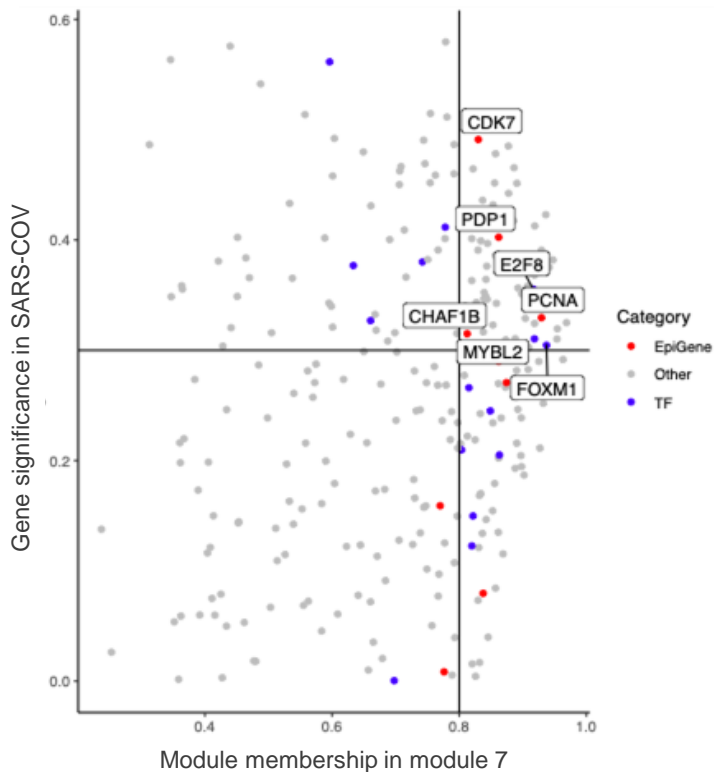

**d**

| Gene | Function                                 | Drug                                                                                                                                                                                                                                          |
|------|------------------------------------------|-----------------------------------------------------------------------------------------------------------------------------------------------------------------------------------------------------------------------------------------------|
| CDK7 | Regulator of cell cycle progression / TF | Nintedanib, Erlotinib, Dasatinib, Crizotinib, Sorafenib, Ruxolitinib, Tofacitinib, Palbociclib, Masitinib, Midostaurin, Sunitinib, Neratinib, Imatinib, Lapatinib, Afatinib, Pazopanib, Bosutinib, Axitinib, Vandetanib, Gefitinib, Nilotinib |
| PCNA | Cofactor of DNA polymerase delta         | Liothyronine, Acetylsalicylic acid                                                                                                                                                                                                            |

**Supplementary Figure 4. Potential epigenetic therapeutic targets for MERS and SARS-CoV.** **a** Module membership and Gene Significance of gene members of module 1. **b** Approved drugs for module 1's important epifactors and TFs. **c** Module membership and Gene Significance of gene members of module 7. **d** Approved drugs for module 7's important epifactors and TFs
